# Supplementary material for: New Structural and Functional Contexts of the Dx[DN]xDG Linear Motif: Insights into Evolution of Calcium-Binding Proteins
Source: PubMed Central journal article supplement (PMC3123361; doi:10.1371/journal.pone.0021507), 2011-06-24
Supplement: pone.0021507.s001.pdf [file pone.0021507.s001.pdf]

Figure S1. Secondary structure context of the Dx[DN]xDG motifs, highlighting additional metal-binding residues (Table 1). The figure includes those motifs described in ref. [15], Rigden & Galperin (2004) The Dx<sub>2</sub>DG motif for calcium binding: Multiple structural contexts and implications for evolution. *J Mol Biol* 343(4): 971-984. Residues binding to metal using side chains are in red (direct interaction with calcium) or purple (through-water interaction). Secondary structure as defined by STRIDE [74] is indicated as follows:  $\alpha$ -helices, blue shading;  $\beta$ -strands, yellow shading;  $3_{10}$  helices, green shading; turns, brackets.

### New folds

2z2x

202 QAILGPDGVADKDG<sup>red</sup>GI IAGD<sup>red</sup>PDDAAEVISMSL 235

2zxq

591 LPQMAVAIA<sup>yellow</sup>G<sup>red</sup>DENED<sup>red</sup>GAVNWQD<sup>red</sup>GAIAYR<sup>blue</sup>DI<sup>blue</sup>MNNP 624

3c68

421 AYHDW<sup>blue</sup>WLRNRD<sup>red</sup>HNG<sup>red</sup>GVPEY<sup>yellow</sup>GAT<sup>red</sup>RDKAHNT<sup>yellow</sup>ESGE 454...544 YSL<sup>yellow</sup>LQ<sup>red</sup>ESVDQA 554

3km5

1169 GEAPAEW<sup>yellow</sup>TTID<sup>red</sup>ADG<sup>red</sup>DGQGW<sup>yellow</sup>LCLS<sup>yellow</sup>SGQLD<sup>yellow</sup>WLTAHG 1202..1216 ALNP<sup>yellow</sup>D<sup>red</sup>NYLISK 1226

### Calcium blades

1jv2

274 AYFGF<sup>yellow</sup>SVAAT<sup>red</sup>DING<sup>red</sup>DDYAD<sup>red</sup>VFIGAP<sup>yellow</sup>PLF<sup>yellow</sup>MDR<sup>yellow</sup>GSDG 307

2z8r

148 TYSANDASV<sup>yellow</sup>GD<sup>red</sup>VDG<sup>red</sup>DGQYEL<sup>yellow</sup>LKWDP<sup>yellow</sup>SNSK<sup>yellow</sup>DNSQ 181

3hx6

841 PNGLS<sup>yellow</sup>SPRLAD<sup>red</sup>NNSD<sup>red</sup>GVAD<sup>red</sup>YAYAGD<sup>yellow</sup>LQGNL<sup>yellow</sup>WRFD 874

2bwr

167 RLDRH<sup>yellow</sup>LRFLAD<sup>red</sup>VTGD<sup>red</sup>GLLDV<sup>yellow</sup>VGF<sup>yellow</sup>GENQ<sup>yellow</sup>VYIARNS 200

### From Rigden & Galperin (2004)

1exr

10 AEFKEAFALF<sup>blue</sup>DKD<sup>red</sup>GDG<sup>yellow</sup>TI<sup>yellow</sup>TTKEL<sup>red</sup>GTVMRS<sup>blue</sup>L<sup>blue</sup>GQNP 43

1gcg

124 AKHWQAN<sup>green</sup>QGW<sup>green</sup>DLNK<sup>red</sup>DGKI<sup>yellow</sup>QYVLLK<sup>yellow</sup>GEPGHPDAEA 157...200 NANKI<sup>blue</sup>EVVIAN 210

1kwh

161 YTVLKAFKEK<sup>blue</sup>DPNG<sup>red</sup>NGKA<sup>red</sup>DEV<sup>green</sup>PFIDRHP<sup>green</sup>DEVFRL 184

1daq  
1 \_\_\_MSTKLYGDVNDGKVNSTDAVALKRYVLRSG 21

1qut  
227 MPSSYKQYAVDFSGDGHINLWDPVDAIGSVANYF 260

1acc  
167 PELKQKSSVPDRDNDGIPDSLEVEGYTVDVKNKR 200

1lwj  
3 GYQIYVRSFRDGNLDGVGDFRGLKNAVSYLKELG 36

1h71  
39 QLTRSGASWHDLNNDGVINLTYTFLTAPPVGYAS 72...109 AARGDDGHQTF 119

1kap  
436 AASKAGSLAIDFSGDAHADFAINLIGQATQADIV 469

lux6 binuclear  
833 RIGDTCDNNQDIDEDGHQNNLDNCPYVPNANQAD 866

lux6 mononuclear  
892 CRLVPNPDQKDSGDGRGDAKDDFDHDSVPDID 925

1vjj  
291 RVITNFNSAHTDRNLSVDVYYDPMGNPLDKGSD 324
