# Supplementary material for: New Structural and Functional Contexts of the Dx[DN]xDG Linear Motif: Insights into Evolution of Calcium-Binding Proteins
Source: PubMed Central journal article supplement (PMC3123361; doi:10.1371/journal.pone.0021507), 2011-06-24
Supplement: pone.0021507.s003.pdf [file pone.0021507.s003.pdf]

**Table S1: Families containing Dx[DN]xDG calcium-binding loops including those described in Rigden & Galperin (2004) The Dx[D]xDG motif for calcium binding: Multiple structural contexts and implications for evolution. J Mol Biol 343(4): 971-984.**

|                                       | Representative <sup>a</sup>                                            | SCOP class; fold of domain containing Dx[DN]xDG loop     | PDB code, reference; position(s) of the first D of Dx[DN]xDG | Distribution of proteins containing Dx[DN]xDG loop                | Frequency of Dx[DN]xDG loop in homologous proteins <sup>b</sup> | R.m.s. fit of Dx[DN]xDG to the first calmodulin motif | Distance between Dx[DN]xDG and later Ca <sup>2+</sup> ligands (residues) | Function of bound calcium                                           |
|---------------------------------------|------------------------------------------------------------------------|----------------------------------------------------------|--------------------------------------------------------------|-------------------------------------------------------------------|-----------------------------------------------------------------|-------------------------------------------------------|--------------------------------------------------------------------------|---------------------------------------------------------------------|
| <b>Novel structural contexts</b>      |                                                                        |                                                          |                                                              |                                                                   |                                                                 |                                                       |                                                                          |                                                                     |
|                                       | <i>Thermococcus kodakaraensis</i> subtilisin                           | $\alpha$ + $\beta$ ; Subtilisin-like <sup>b</sup>        | 2z2x [92]; 212                                               | Some thermophilic archaea                                         | <1% (Pfam PF00082)                                              | 0.12 Å                                                | 4/7                                                                      | Folding, in the context of a 25 residues insertion [23]             |
|                                       | <i>Bifidobacterium longum</i> endo- $\alpha$ -N-acetylglactosaminidase | All $\beta$ ; Supersandwich <sup>b</sup>                 | 2zxq [21]; 601                                               | Bifidobacteria                                                    | Approx 7%                                                       | 0.15 Å                                                | 5                                                                        | Possibly structural [21]                                            |
|                                       | <i>Escherichia coli</i> YgjK from glycoside hydrolase family GH65      | All $\alpha$ ; $\alpha/\alpha$ toroid <sup>b</sup>       | 3c68 [20]; 431                                               | Some $\gamma$ -proteobacteria                                     | Approx 7% (Pfam PF01204)                                        | 0.12 Å                                                | 2/112                                                                    | Not known                                                           |
|                                       | <i>Porphyromonas gingivalis</i> gingipain adhesin domain               | All $\beta$ ; Galactose-binding domain-like <sup>c</sup> | 3km5 [22]; 1179                                              | <i>Porphyromonas gingivalis</i> , <i>Flavobacterium bacterium</i> | Approx 90% (Pfam PF07675)                                       | 0.35 Å                                                | 36                                                                       | Possibly structural [22]                                            |
| <b>Calcium blades</b>                 |                                                                        |                                                          |                                                              |                                                                   |                                                                 |                                                       |                                                                          |                                                                     |
|                                       | Human integrin $\alpha$ V $\beta$ 3                                    | All $\beta$ ; 7-bladed $\beta$ -propeller                | 1jv2 [93]; 284; 349; 413                                     | Eukaryotic                                                        | 100% of 3 sites (Pfam PF01839)                                  | 0.61-1.07 Å                                           | 2                                                                        | Potentially regulatory [93]                                         |
|                                       | <i>Bacillus subtilis</i> rhamnogalacturonan lyase                      | All $\beta$ ; 8-bladed $\beta$ -propeller <sup>c</sup>   | 2z8r [24]; 158; 222; 369                                     | <sup>†</sup>                                                      | <sup>†</sup>                                                    | 0.22-0.36 Å                                           | 2                                                                        | Not known (further calcium-binding site required for activity) [24] |
|                                       | <i>Pseudomonas aeruginosa</i> pilus-biogenesis factor PilY1            | All $\beta$ ; 7-bladed $\beta$ -propeller <sup>c</sup>   | 3hx6 [25]; 851                                               | Bacterial                                                         | Approx 75% (Pfam PF05567)                                       | 0.37 Å                                                | 2                                                                        | Regulation of pilus biogenesis and motility [25]                    |
|                                       | <i>Psathyrella velutina</i> lectin                                     | All $\beta$ ; 7-bladed $\beta$ -propeller <sup>c</sup>   | 2bwr [26]; 177; 233; 343 <sup>e</sup>                        | <sup>†</sup>                                                      | <sup>†</sup>                                                    | 0.48-0.55 Å                                           | 2                                                                        | Possibly structural [26]                                            |
| <b>From Rigden and Galperin, 2004</b> |                                                                        |                                                          |                                                              |                                                                   |                                                                 |                                                       |                                                                          |                                                                     |
|                                       | <i>Paramecium tetraurelia</i> calmodulin                               | All $\alpha$ ; EF Hand-like                              | 1exr; 20; 56; 93; 129                                        | Mainly eukaryotic, few bacterial, very few archaeal               | Almost 100% of variable number of sites (4 in representative)   | 0.00 - 0.42 Å                                         | 5 (when present)                                                         | Regulation or structural or buffering/transport                     |

|                                                                     |                                                       |                                    |                                      |                                                         |                       |                                           |                                  |
|---------------------------------------------------------------------|-------------------------------------------------------|------------------------------------|--------------------------------------|---------------------------------------------------------|-----------------------|-------------------------------------------|----------------------------------|
| <i>Salmonella typhimurium</i> periplasmic galactose-binding protein | $\alpha/\beta$ ; Periplasmic binding protein-like I   | 1gcg; 134                          | Bacterial                            | Approx. 3%                                              | 0.27 Å                | 3/65                                      | Structural                       |
| <i>Sphingomonas</i> sp. periplasmic alginate-binding protein        | $\alpha/\beta$ ; Periplasmic binding protein-like II  | 1kwh; 171                          | Bacterial                            | Approx 1%                                               | 0.36 Å                | 2/3                                       | Potentially sensor               |
| <i>Clostridium thermocellum</i> dockerin                            | All $\alpha$ ; Type I dockerin domain                 | 1daq; 8; 40                        | Bacterial, very few archaeal         | 100% of 2 sites                                         | 0.98-1.12 Å           | 5                                         | Structural                       |
| <i>Escherichia coli</i> soluble lytic transglycosylase Slt35        | $\alpha+\beta$ ; Lysozyme-like                        | 1qut; 237                          | Bacterial                            | 100%                                                    | 0.42 Å                | 8                                         | Not known                        |
| <i>Bacillus anthracis</i> protective antigen                        | Membrane and cell-surface; Anthrax protective antigen | 1acc; 177                          | Bacterial                            | 100%                                                    | 0.31 Å                | 2 <sup>d</sup> /5                         | Structural                       |
| <i>Thermotoga maritima</i> 4- $\alpha$ -glucanotransferase          | $\alpha/\beta$ ; TIM $\beta/\alpha$ -barrel           | 1lwj; 13                           | Eukaryotic and bacterial             | Approx. 35%                                             | 0.71 Å                | 2                                         | Not known                        |
| <i>Pseudomonas</i> 'Tac II 18' alkaline protease                    | $\alpha+\beta$ ; Zincin-like                          | 1h71; 49                           | <i>Pseudomonas</i> , <i>Serratia</i> | Approx. 35%                                             | 0.18 Å                | 2/59                                      | Not known                        |
| <i>Pseudomonas aeruginosa</i> alkaline protease                     | All $\beta$ ; $\beta$ -roll                           | 1kap; 446                          | <i>Pseudomonas aeruginosa</i>        | Approx. 15%                                             | 0.37 Å                | 2                                         | Not known                        |
| Human thrombospondin-1                                              | Small proteins; TSP type-3 repeats                    | 1ux6; 828; 843; 866; 879; 915; 902 | Metazoan                             | 100% of 5 binuclear sites<br>100% of 1 mononuclear site | 0.18-0.26 Å<br>0.24 Å | 2 <sup>e</sup> /5<br>2 <sup>c</sup>       | Regulation of binding            |
| Human transglutaminase 3                                            | $\alpha+\beta$ ; Cysteine proteinases                 | 1vjj; 301                          | Eukaryotic                           | Approx 20%                                              | 0.42 Å                | 18                                        | Regulation of catalytic activity |
| <i>Thermoascus aurantiacus</i> cellulase                            | $\alpha/\beta$ ; TIM $\beta/\alpha$ -barrel           | 1gzj; 287                          | Bacterial and yeast                  | Approx. 10%                                             | 0.72 Å                | No later D or E predicted to bind calcium | Not known                        |

<sup>a</sup> With the exception of the *Thermoascus aurantiacus* cellulase (last line of the Table), all proteins have been demonstrated to bind calcium ions, see Rigden & Galperin (2004) for additional references

<sup>b</sup> As defined by Pfam, SMART or by full-length matches in PSI-BLAST (E-value of 0.0001) run until convergence.

<sup>c</sup> Based on the entry for a homologous protein or from authors' description

<sup>d</sup> Through water interaction with calcium

<sup>e</sup> The motif commencing from residue 233 is not bound to Ca<sup>2+</sup> in the deposited structure but crystal soak data show that it is capable of doing so [26]

<sup>f</sup> A distinct group could not be defined with PSI-BLAST
